# Supplementary material
Source: PubMed Central journal article supplement (PMC6790779)
Supplement: rspb20191067supp1.pdf [file rspb20191067supp1.pdf]

Table s1. Tukey comparisons for bat attacks on pug-nosed tree frog (a) and túngara frog (b) calls, and midges attracted to pug-nosed tree frog (c) and túngara frog (d) calls. Table corresponds to Fig. 3a-d. The values for least squares means estimate, standard error, *t*-ratio, and *p*-value were calculated using the *emmeans* R package [1]. Cohn's *d* effect size was calculated using the *lsr* R package [2].

|                                                                | Least squares means | Standard error | <i>t</i> -ratio | <i>p</i> -value | Cohn's <i>d</i> effect size |
|----------------------------------------------------------------|---------------------|----------------|-----------------|-----------------|-----------------------------|
| (a) Bat attacks on pug-nosed tree frog calls<br>(df = 39)      |                     |                |                 |                 |                             |
| 5ms - 79ms                                                     | -0.746              | 0.486          | -1.536          | 0.286           | 0.307                       |
| 5ms - alt                                                      | -1.305              | 0.459          | -2.846          | 0.019 *         | 0.729                       |
| 79ms - alt                                                     | -0.560              | 0.378          | -1.482          | 0.310           | 0.439                       |
| (b) Bat attacks on túngara frog calls<br>(df = 27)             |                     |                |                 |                 |                             |
| 5ms - 79ms                                                     | -0.144              | 0.402          | -0.358          | 0.932           | < 0.001                     |
| 5ms - alt                                                      | 0.157               | 0.412          | 0.380           | 0.924           | 0.223                       |
| 79ms - alt                                                     | 0.301               | 0.414          | 0.728           | 0.749           | 0.128                       |
| (c) Midges attracted to pug-nosed tree frog calls<br>(df = 63) |                     |                |                 |                 |                             |
| 5ms - 79ms                                                     | 0.047               | 0.260          | 0.182           | 0.982           | 0.121                       |
| 5ms - alt                                                      | -0.412              | 0.256          | -1.609          | 0.242           | 0.249                       |
| 79ms - alt                                                     | -0.459              | 0.250          | -1.835          | 0.402           | 0.166                       |
| (d) Midges attracted to túngara frog calls<br>(df = 66)        |                     |                |                 |                 |                             |
| 5ms - 79ms                                                     | -0.232              | 0.199          | -1.166          | 0.478           | 0.184                       |
| 5ms - alt                                                      | -0.559              | 0.199          | -2.814          | 0.018 *         | 0.228                       |
| 79ms - alt                                                     | -0.327              | 0.195          | -1.682          | 0.220           | 0.164                       |

1. Searle SR, Speed FM, Milliken GA. 1980 Population Marginal Means in the Linear Model: An Alternative to Least Squares Means. *Am. Stat.* **34**, 216–221.

2. Navarro D. 2015 *lsr: Companion to "Learning Statistics with R"*. University of Adelaide. Adelaide, Australia (<https://cran.r-project.org/web/packages/lsr/index.html>)
